# Supplementary material
Source: PubMed Central journal article supplement (PMC5131645)
Supplement: NIHMS828696-supplement-Supplemental_Table_2.pdf [file NIHMS828696-supplement-Supplemental_Table_2.pdf]

| Array-ID  | gender | Age | WBC     | Hb   | PLT     | BCOR mutation | BCOR Sequenz    | type        | %mutation load | Morphology | Karyotype | Karyotype Cells | CEBPA    | FLT3-LM  | MLL-PTD  | NPM1     |
|-----------|--------|-----|---------|------|---------|---------------|-----------------|-------------|----------------|------------|-----------|-----------------|----------|----------|----------|----------|
| MLL_00106 | Male   | 67  | 3,200   | 12.7 | 80,000  | NEGATIVE      |                 |             |                | AML M4     | 46,XY     | 22              | NEGATIVE | NEGATIVE | NEGATIVE | POSITIVE |
| MLL_00107 | Male   | 75  | 80,000  | 8    | 20,000  | NEGATIVE      |                 |             |                | AML M1     | 46,XY     | 20              | NEGATIVE | NEGATIVE | NEGATIVE | NEGATIVE |
| MLL_00112 | Male   | 55  |         |      |         | NEGATIVE      |                 |             |                | AML M2     | 46,XY     | 20              | NEGATIVE | NEGATIVE | NEGATIVE | NEGATIVE |
| MLL_00114 | Male   | 52  | 9,500   | 11.2 | 71,000  | NEGATIVE      |                 |             |                | AML M2     | 46,XY     | 20              | NEGATIVE | NEGATIVE | NEGATIVE | NEGATIVE |
| MLL_00115 | Male   | 63  | 20,800  | 7.5  | 44,000  | NEGATIVE      |                 |             |                | AML M0     | 46,XY     | 20              | NEGATIVE | NEGATIVE | NEGATIVE | NEGATIVE |
| MLL_00238 | Male   | 75  | 34,400  | 11.1 | 370,000 | NEGATIVE      |                 |             |                | AML M1     | 46,XY     | 20              | POSITIVE | NEGATIVE | NEGATIVE | POSITIVE |
| MLL_00120 | Male   | 81  | 47,400  | 8.1  | 58,000  | POSITIVE      | Arg342X         | destructive | 96             | AML M2     | 46,XY     | 20              | NEGATIVE | NEGATIVE | NEGATIVE | NEGATIVE |
| MLL_00122 | Male   | 72  | 120,000 | 7.5  | 45,000  | POSITIVE      | Arg1661X        | destructive | 97             | AML M2     | 46,XY     | 22              | NEGATIVE | NEGATIVE | NEGATIVE | NEGATIVE |
| MLL_00124 | Male   | 73  | 32,200  | 8.2  | 213,000 | POSITIVE      | Asp975GlyfsX2   | destructive | 92             | AML M4     | 46,XY     | 20              | NEGATIVE | NEGATIVE | NEGATIVE | NEGATIVE |
| MLL_00125 | Male   | 41  |         |      |         | POSITIVE      | Ser369TrpfsX12  | destructive | 100            | AML M1     | 46,XY     | 21              | NEGATIVE | NEGATIVE | NEGATIVE | NEGATIVE |
| MLL_00126 | Male   | 65  | 2,000   | 9.8  | 142,000 | POSITIVE      | Arg1547X        | destructive | 20             | AML M6     | 46,XY     | 18              | NEGATIVE | NEGATIVE |          | NEGATIVE |
| MLL_00129 | Male   | 68  | 62,700  | 9.7  | 38,000  | POSITIVE      | Gly1376IlefsX65 | destructive | 30.5           | AML M1     | 46,XY     | 20              | NEGATIVE | NEGATIVE | NEGATIVE | NEGATIVE |
