# Supplementary material
Source: PubMed Central journal article supplement (PMC5131645)
Supplement: NIHMS828696-supplement-Supplemental_Table_3.pdf [file NIHMS828696-supplement-Supplemental_Table_3.pdf]

| Exam No   | Sex  | BCOR mut=1; BCOR wt=0 | Material sent | Func     | Gene | ExonicFunc           | AChange                                    | Start    | End      | Ref | Obs | mutation_load | reads_total | reads_variant | Age  | Morphology | Cytogenetics     | IPSS           | IPSS-R       |
|-----------|------|-----------------------|---------------|----------|------|----------------------|--------------------------------------------|----------|----------|-----|-----|---------------|-------------|---------------|------|------------|------------------|----------------|--------------|
| 10-012914 | Male | 1                     | BM            | exonic   | BCOR | frameshift insertion | NM_001123384:c.4172_4173insGGAGA:p.T1391fs | 39921492 | 39921492 | -   | TCT | 0.470394737   | 304         | 143           | 81   | RARS-T     | normal karyotype | low            | low          |
| 09-011649 | Male | 1                     | BM            | exonic   | BCOR | frameshift insertion | NM_001123384:c.3367_3368insAA:p.D1123fs    | 39923670 | 39923670 | -   | TT  | 0.74611399    | 193         | 144           | 61.9 | RCMD       | normal karyotype | intermediate 1 | intermediate |
| 09-002790 | Male | 1                     | BM            | exonic;s | BCOR | stopgain SNV         | NM_001123384:c.G4663T:p.E1555X             | 39913509 | 39913509 | C   | A   | 0.707317073   | 779         | 551           | 62.9 | RAEB-1     | normal karyotype | intermediate 1 | intermediate |
| 10-022162 | Male | 1                     | BM            | exonic   | BCOR | stopgain SNV         | NM_001123384:c.C3433T:p.R1145X             | 39923604 | 39923604 | G   | A   | 0.96835443    | 158         | 153           | 80.8 | RAEB-1     | normal karyotype | intermediate 1 | intermediate |
| 09-026043 | Male | 1                     | BM            | exonic   | BCOR | stopgain SNV         | NM_001123384:c.C3436T:p.R1146X             | 39923601 | 39923601 | G   | A   | 0.75          | 240         | 180           | 67.8 | RAEB-1     | normal karyotype | intermediate 1 | high         |
| 09-025370 | Male | 1                     | BM            | exonic   | BCOR | frameshift deletion  | NM_001123383:c.811delT:p.S271fs            | 39933788 | 39933788 | A   | -   | 0.459821429   | 448         | 206           | 75.2 | RAEB-2     | normal karyotype | intermediate 2 | high         |
| 10-024978 | Male | 1                     | BM            | exonic   | BCOR | frameshift insertion | NM_001123383:c.1655_1656insG:p.A552fs      | 39932944 | 39932944 | -   | C   | 0.829424307   | 469         | 389           | 69.6 | RAEB-2     | normal karyotype | intermediate 2 | very high    |
| 05-002208 | Male | 1                     | BM            | exonic   | BCOR | frameshift deletion  | NM_001123384:c.3248delC:p.P1083fs          | 39923789 | 39923789 | G   | -   | 0.752124646   | 706         | 531           | 83.6 | RAEB-2     | normal karyotype | not known      | not known    |
| 07-008922 | Male | 1                     | BM            | exonic   | BCOR | frameshift deletion  | NM_001123384:c.3819delA:p.K1273fs          | 39922197 | 39922197 | T   | -   | 0.132882883   | 444         | 59            | 81.2 | RCMD       | normal karyotype | intermediate 1 | low          |
| 08-018374 | Male | 1                     | BM            | exonic   | BCOR | nonsynonymous SNV    | NM_001123384:c.G4234A:p.E1412K             | 39921430 | 39921430 | C   | T   | 0.111111111   | 153         | 17            | 69.3 | RAEB-1     | normal karyotype | intermediate 1 | low          |
| 09-005669 | Male | 1                     | BM            | exonic   | BCOR | frameshift deletion  | NM_001123384:c.4888_4897del:p.1630_1633del | 39911577 | 39911586 | GAA | -   | 0.602006689   | 299         | 180           | 58   | RAEB-1     | normal karyotype | intermediate 1 | high         |
| 08-005827 | Male | 1                     | BM            | exonic   | BCOR | frameshift insertion | NM_001123384:c.4568_4569insA:p.M1523fs     | 39914638 | 39914638 | -   | T   | 0.206395349   | 344         | 71            | 61.3 | RAEB-2     | normal karyotype | intermediate 2 | high         |
| 09-008756 | Male | 0                     | BM            |          |      |                      |                                            |          |          |     |     |               |             |               | 60.6 | RAEB-1     | normal karyotype | intermediate 1 | intermediate |
| 09-011674 | Male | 0                     | BM            |          |      |                      |                                            |          |          |     |     |               |             |               | 67.5 | RCMD       | normal karyotype | intermediate 1 | intermediate |
| 08-021733 | Male | 0                     | BM            |          |      |                      |                                            |          |          |     |     |               |             |               | 80.9 | RAEB-1     | normal karyotype | intermediate 1 | intermediate |
| 07-000867 | Male | 0                     | BM            |          |      |                      |                                            |          |          |     |     |               |             |               | 75.6 | RAEB-2     | normal karyotype | intermediate 2 | high         |
| 08-009253 | Male | 0                     | BM            |          |      |                      |                                            |          |          |     |     |               |             |               | 83.8 | RAEB-2     | normal karyotype | intermediate 2 | intermediate |
| 12-006306 | Male | 0                     | BM            |          |      |                      |                                            |          |          |     |     |               |             |               | 83.1 | RARS-T     | normal karyotype | low            | low          |
| 09-004647 | Male | 0                     | BM            |          |      |                      |                                            |          |          |     |     |               |             |               | 67.5 | RAEB-1     | normal karyotype | intermediate 1 | high         |
| 12-019861 | Male | 0                     | BM            |          |      |                      |                                            |          |          |     |     |               |             |               | 72.5 | RAEB-2     | normal karyotype | intermediate 2 | very high    |
| 07-002826 | Male | 0                     | BM            |          |      |                      |                                            |          |          |     |     |               |             |               | 80.8 | RCMD       | normal karyotype | low            | very low     |
| 11-009704 | Male | 0                     | BM            |          |      |                      |                                            |          |          |     |     |               |             |               | 81   | RARS-T     | normal karyotype | low            | very low     |
| 08-008723 | Male | 0                     | BM            |          |      |                      |                                            |          |          |     |     |               |             |               | 68.3 | RA         | normal karyotype | low            | low          |
| 08-025142 | Male | 0                     | BM            |          |      |                      |                                            |          |          |     |     |               |             |               | 83.8 | RCMD       | normal karyotype | low            | low          |
| 07-001244 | Male | 0                     | BM            |          |      |                      |                                            |          |          |     |     |               |             |               | 62.4 | RAEB-1     | normal karyotype | intermediate 1 | low          |
| 08-006600 | Male | 0                     | BM            |          |      |                      |                                            |          |          |     |     |               |             |               | 80.7 | RAEB-1     | normal karyotype | intermediate 1 | low          |
| 08-007100 | Male | 0                     | BM            |          |      |                      |                                            |          |          |     |     |               |             |               | 70.1 | RAEB-1     | normal karyotype | intermediate 1 | low          |
| 08-019074 | Male | 0                     | BM            |          |      |                      |                                            |          |          |     |     |               |             |               | 68.3 | RAEB-1     | normal karyotype | intermediate 1 | low          |
| 09-005067 | Male | 0                     | BM            |          |      |                      |                                            |          |          |     |     |               |             |               | 62.5 | RAEB-1     | normal karyotype | intermediate 1 | low          |
| 09-013930 | Male | 0                     | BM            |          |      |                      |                                            |          |          |     |     |               |             |               | 63.2 | RCMD       | normal karyotype | intermediate 1 | low          |
| 10-018512 | Male | 0                     | BM            |          |      |                      |                                            |          |          |     |     |               |             |               | 58.8 | RAEB-1     | normal karyotype | intermediate 1 | low          |

|           |        |   |    |          |      |                      |                                                    |          |          |     |     |             |      |     |      |         |                  |                  |                |              |              |
|-----------|--------|---|----|----------|------|----------------------|----------------------------------------------------|----------|----------|-----|-----|-------------|------|-----|------|---------|------------------|------------------|----------------|--------------|--------------|
| 11-031738 | Male   | 0 | BM |          |      |                      |                                                    |          |          |     |     |             |      |     |      | 69.7    | RAEB-1           | normal karyotype | intermediate 1 | low          |              |
| 05-001144 | Male   | 0 | BM |          |      |                      |                                                    |          |          |     |     |             |      |     |      | 27.6    | RA               | normal karyotype | intermediate 1 | intermediate |              |
| 11-026392 | Male   | 0 | BM |          |      |                      |                                                    |          |          |     |     |             |      |     |      | 70.8    | RAEB-2           | normal karyotype | intermediate 1 | intermediate |              |
| 07-011921 | Male   | 0 | BM |          |      |                      |                                                    |          |          |     |     |             |      |     |      | 81.7    | RAEB-2           | normal karyotype | intermediate 2 | high         |              |
| 09-002844 | Male   | 0 | BM |          |      |                      |                                                    |          |          |     |     |             |      |     |      | 62.6    | RAEB-2           | normal karyotype | intermediate 2 | high         |              |
| 08-017576 | Male   | 0 | BM |          |      |                      |                                                    |          |          |     |     |             |      |     |      | 61.8    | RAEB-2           | normal karyotype | not known      | not known    |              |
| 09-000188 | Male   | 0 | BM |          |      |                      |                                                    |          |          |     |     |             |      |     |      | 75.3    | RAEB-2           | normal karyotype | not known      | not known    |              |
|           |        |   |    |          |      |                      |                                                    |          |          |     |     |             |      |     |      |         |                  |                  |                |              |              |
| 10-027628 | Female | 1 | BM | exonic   | BCOR | nonsynonymous SNV    | NM_001123383:c.G1294A:p.V432I                      | 39933305 | 39933305 | C   | T   | 0.444444444 | 1611 | 716 | 74.8 | RCMD-RS | normal karyotype | low              | low            | very low     |              |
| 10-008924 | Female | 1 | BM | splicing | BCOR | splice-site mutation | NM_001123384:E10                                   | 39921389 | 39921391 | CAC | -   | 0.207920792 | 202  | 42  | 76.1 | RARS    | normal karyotype | low              | low            | low          |              |
| 11-002758 | Female | 1 | BM | exonic   | BCOR | stopgain SNV         | NM_001123383:c.C1118A:p.S373X                      | 39933481 | 39933481 | G   | T   | 0.458398744 | 637  | 292 | 72.1 | RCMD-RS | normal karyotype | low              | low            | low          |              |
| 12-029317 | Female | 1 | BM | exonic   | BCOR | nonsynonymous SNV    | NM_001123384:c.A4085G:p.Q1362R                     | 39921579 | 39921579 | T   | C   | 0.443762781 | 489  | 217 | 70.7 | RCMD-RS | normal karyotype | low              | low            | low          |              |
| 09-007410 | Female | 1 | BM | exonic   | BCOR | stopgain SNV         | NM_001123384:c.G3382T:p.E1128X                     | 39923655 | 39923655 | C   | A   | 0.439285714 | 280  | 123 | 68.5 | RCMD-RS | normal karyotype | low              | low            | intermediate |              |
| 09-011104 | Female | 1 | BM | exonic   | BCOR | stopgain SNV         | NM_001123384:c.C3433T:p.R1145X                     | 39923604 | 39923604 | G   | A   | 0.405919662 | 473  | 192 | 86.9 | RAEB-2  | normal karyotype | intermediate 1   | intermediate   | intermediate |              |
| 09-018857 | Female | 1 | BM | exonic   | BCOR | frameshift insertion | NM_001123383:c.2751_2752insTTTA:p.T917fs           | 39931848 | 39931848 | -   | TAA | 0.221078134 | 1651 | 365 | 70.8 | RAEB-1  | normal karyotype | intermediate 1   | intermediate   | intermediate |              |
| 09-018165 | Female | 1 | BM | exonic;s | BCOR | stopgain SNV         | NM_001123384:c.3448_3449insTA:p.G1150_L1151delinsX | 39923589 | 39923589 | -   | TA  | 0.391061453 | 537  | 210 | 59.4 | RAEB-1  | normal karyotype | intermediate 1   | intermediate   | high         |              |
| 10-034166 | Female | 1 | BM | splicing | BCOR | splice-site mutation | NM_001123384:E14                                   | 39913137 | 39913137 | A   | G   | 0.365384615 | 780  | 285 | 74.9 | RAEB-2  | normal karyotype | intermediate 2   | intermediate   | high         |              |
| 11-030207 | Female | 1 | BM | exonic   | BCOR | stopgain SNV         | NM_001123383:c.A634T:p.K212X                       | 39933965 | 39933965 | T   | A   | 0.161574314 | 1931 | 312 | 85.1 | RAEB-2  | normal karyotype | intermediate 2   | intermediate   | high         |              |
| 09-002017 | Female | 1 | BM | exonic   | BCOR | frameshift insertion | NM_001123383:c.916_917insT:p.H306fs                | 39933683 | 39933683 | -   | A   | 0.40776699  | 103  | 42  | 70.7 | RAEB-2  | normal karyotype | intermediate 2   | intermediate   | very high    |              |
| 12-003018 | Female | 0 | BM |          |      |                      |                                                    |          |          |     |     |             |      |     |      | 70.4    | RCMD-RS          | normal karyotype | low            | low          | very low     |
| 09-025638 | Female | 0 | BM |          |      |                      |                                                    |          |          |     |     |             |      |     |      | 67.6    | RCMD-RS          | normal karyotype | low            | low          | low          |
| 10-036519 | Female | 0 | BM |          |      |                      |                                                    |          |          |     |     |             |      |     |      | 76.3    | RARS             | normal karyotype | low            | low          | low          |
| 11-026186 | Female | 0 | BM |          |      |                      |                                                    |          |          |     |     |             |      |     |      | 74.7    | RCMD-RS          | normal karyotype | low            | low          | low          |
| 11-029005 | Female | 0 | BM |          |      |                      |                                                    |          |          |     |     |             |      |     |      | 78.3    | RCMD-RS          | normal karyotype | low            | low          | low          |
| 11-032640 | Female | 0 | BM |          |      |                      |                                                    |          |          |     |     |             |      |     |      | 65.3    | RCMD-RS          | normal karyotype | low            | low          | low          |
| 12-013743 | Female | 0 | BM |          |      |                      |                                                    |          |          |     |     |             |      |     |      | 74.9    | RCMD-RS          | normal karyotype | low            | low          | low          |
| 10-026107 | Female | 0 | BM |          |      |                      |                                                    |          |          |     |     |             |      |     |      | 75.8    | RCMD-RS          | normal karyotype | intermediate 1 | intermediate | low          |
| 11-032285 | Female | 0 | BM |          |      |                      |                                                    |          |          |     |     |             |      |     |      | 72.8    | RAEB-1           | normal karyotype | intermediate 1 | intermediate | low          |
| 06-012269 | Female | 0 | BM |          |      |                      |                                                    |          |          |     |     |             |      |     |      | 79.5    | RAEB-1           | normal karyotype | intermediate 1 | intermediate | intermediate |
| 07-007280 | Female | 0 | BM |          |      |                      |                                                    |          |          |     |     |             |      |     |      | 73.8    | RAEB-1           | normal karyotype | intermediate 1 | intermediate | intermediate |
| 08-004706 | Female | 0 | BM |          |      |                      |                                                    |          |          |     |     |             |      |     |      | 60.6    | RAEB-1           | normal karyotype | intermediate 1 | intermediate | intermediate |
| 08-006581 | Female | 0 | BM |          |      |                      |                                                    |          |          |     |     |             |      |     |      | 56.4    | RAEB-1           | normal karyotype | intermediate 1 | intermediate | intermediate |
| 08-018593 | Female | 0 | BM |          |      |                      |                                                    |          |          |     |     |             |      |     |      | 71.9    | RAEB-1           | normal karyotype | intermediate 1 | intermediate | intermediate |
| 09-010719 | Female | 0 | BM |          |      |                      |                                                    |          |          |     |     |             |      |     |      | 73.5    | RAEB-1           | normal karyotype | intermediate 1 | intermediate | intermediate |
| 10-011271 | Female | 0 | BM |          |      |                      |                                                    |          |          |     |     |             |      |     |      | 75.8    | RAEB-2           | normal karyotype | intermediate 1 | intermediate | intermediate |
| 10-031376 | Female | 0 | BM |          |      |                      |                                                    |          |          |     |     |             |      |     |      | 74      | RAEB-2           | normal karyotype | intermediate 2 | intermediate | intermediate |

|           |        |   |    |  |  |  |  |  |  |  |  |  |  |  |  |      |         |                  |                |           |
|-----------|--------|---|----|--|--|--|--|--|--|--|--|--|--|--|--|------|---------|------------------|----------------|-----------|
| 07-012062 | Female | 0 | BM |  |  |  |  |  |  |  |  |  |  |  |  | 71.7 | RAEB-2  | normal karyotype | intermediate 2 | high      |
| 08-003790 | Female | 0 | BM |  |  |  |  |  |  |  |  |  |  |  |  | 83.2 | RAEB-2  | normal karyotype | intermediate 2 | high      |
| 09-025284 | Female | 0 | BM |  |  |  |  |  |  |  |  |  |  |  |  | 89.1 | RAEB-2  | normal karyotype | intermediate 2 | high      |
| 10-017048 | Female | 0 | BM |  |  |  |  |  |  |  |  |  |  |  |  | 85.7 | RAEB-2  | normal karyotype | intermediate 2 | high      |
| 10-022875 | Female | 0 | BM |  |  |  |  |  |  |  |  |  |  |  |  | 87.4 | RAEB-2  | normal karyotype | intermediate 2 | high      |
| 07-013982 | Female | 0 | BM |  |  |  |  |  |  |  |  |  |  |  |  | 76.3 | RARS    | normal karyotype | not known      | not known |
| 11-014829 | Female | 0 | BM |  |  |  |  |  |  |  |  |  |  |  |  | 74.4 | RCMD-RS | normal karyotype | not known      | not known |
